# Supplementary material for: Kinetic resolution of chiral aminoalkenes via asymmetric hydroamination/cyclisation using binaphtholate yttrium complexesElectronic supplementary information (ESI) available: experimental procedures and characterising data for all new complexes and substrates. See http://www.rsc.org/suppdata/cc/b3/b316096c/
Source: Royal Society of Chemistry journal article supplement (doi:10.1039/b316096c), 2004-01-01
Supplement: b316096c.doc [file b316096c.doc]

# Electronic Supplementary Information

Kinetic resolution of chiral aminoalkenes via asymmetric hydroamination/cyclisation using binaphtholate yttrium complexes

Denis V. Gribkov and Kai C. Hultzsch*

**Experimental Section**

**General Considerations.** All operations were performed under an inert atmosphere of nitrogen or argon using standard Schlenk-line or glovebox techniques. After drying over KOH, THF was distilled from sodium benzophenone ketyl. Hexanes, Pentane and toluene were purified by distillation from sodium/triglyme benzo­phenone ketyl. Anhydrous YCl3 (Aldrich) and (*R*)-BINOL (>99% ee, from Reuter Chemische Apparatebau KG (RCA), Freiburg, Germany) were used as received. (*R*)-(+)--Methoxy--trifluoro-methylphenylacetic acid (RCA) was transformed to its acid chloride using oxalyl chloride/DMF in hexanes.[[1]](#endnote-2) [Y(o-C6H4CH2NMe2)3],[[2]](#endnote-3) (*R*)-3,3'-bis(triphenylsilyl)-2,2'-dihydroxy-1,1'-binaphthyl,[[3]](#endnote-4) (*R*)-3,3'-bis(tri-3,5-xylylsilyl)-2,2'-dihydroxy-1,1'-binaphthylError: Reference source not foundaand substrates **2**,[[4]](#endnote-5) **4**,[[5]](#endnote-6) **6**[[6]](#endnote-7) and **8**[[7]](#endnote-8) were synthesized as described in the literature. The substrates were distilled from finely powdered CaH2 and stored over molecular sieves. All other chemicals were commercially available and were used as received. 1H, 13C and 19F NMR spectra were recorded on Bruker Avance 300 or Avance 400 spectrometer. Elemental analyses were performed by the Microanalytical Laboratory of this department.

**(*R*)-[Y(Binol-SiPh3)(o-C6H4CH2NMe2)](Me2NCH2Ph) (1a).** To a mixture of (*R*)-3,3'-bis(triphenylsilyl-)-2,2'-dihydroxy-1,1'-binaphthyl (408 mg, 0.51 mmol) and [Y(o-C6H4CH2NMe2)3] (246 mg, 0.50 mmol) was added toluene (4 mL). The mixture was stirred overnight at room temperature (12 h) and the solvent was removed in *vacuo*. The residue was dried in *vacuo* for 4 h to give a solid glass-like material in quantitative yield. The complex could not be crystallized and was therefore used without further purification. The product often contained various amounts of uncoordinated *N*,*N*-dimethylbenzylamine, which is slowly exchanged with coordinated amine and was difficult to remove in *vacuo*. 1H NMR (400 MHz, 5 °C, C6D6):  8.55 (s, 1H, aryl-H), 8.48 (s, 1H, aryl-H), 8.03 (m, 6H, aryl-H), 7.94 (s, 6H, aryl-H), 7.7 - 6.9 (m, 52H, aryl-H), 6.79 (m, 4H, aryl-H), 6.60 (d, 3*J*H,H = 7.1 Hz, 2H, aryl-H), 3.24 (m, 5H, CH2 of o-C6H4CH2NMe2 as well as CH2 of coordinated and free amine), 2.49 (d, 2*J*H,H = 14.2 Hz, 1H, CH2 of o-C6H4CH2NMe2), 2.07 (s, 6H, N(CH3)2 of free amine), 1.49 (s, 3H, N(CH3)2), 1.31 (s, 3H, N(CH3)2), 1.29 (s, 3H, N(CH3)2), 1.24 (s, 3H, N(CH3)2); 13C{1H} NMR (100.6 MHz, 5 °C, C6D6):  181.7 (d, 1*J*Y,C = 52.7 Hz), 163.5, 163.0, 162.9, 161.4, 148.4, 141.6, 141.5, 140.0, 139.5, 139.3, 138.1, 137.8, 137.0, 136.8, 136.2, 135.9, 135.1, 131.8, 130.1, 129.8, 129.5, 129.4, 129.1, 129.0, 128.8, 128.6, 128.5, 127.4, 127.2, 126.5, 126.0, 125.8, 125.7, 125.6, 124.8, 122.5, 117.1, 116.6 (aryl), 67.6 (CH2), 64.4(CH2 of free amine), 57.9 (CH2 of coordinated amine), 46.4 (N(CH3)2)), 45.4 (N(CH3)2) of free amine), 44.2 (N(CH3)2)), 40.3 (N(CH3)2)), 40.2 (N(CH3)2) of coordinated amine). Anal.Calcd. for C74H65N2O2Si2Y: C, 76.66; H, 5.65; N, 2.76. Found: C, 76.52; H, 6.66; N, 2.43.

**(*R*)-[Y{Binol-Si(3,5-xylyl)3}(o-C6H4CH2NMe2)](Me2NCH2Ph) (1b).** To a mixture of (*R*)-3,3'-bis(tri-3,5-xylylsilyl)-2,2'-dihydroxy-1,1'-binaphthyl (300 mg, 0.309 mmol) and [Y(o-C6H4CH2NMe2)3] (148 mg, 0.3 mmol) was added toluene (4 mL). The mixture was stirred overnight at room temperature (12 h) and the solvent was removed in *vacuo*. The residue was dried in *vacuo* for 4h to give a solid glass-like material in quantitative yield. Crystallization from hexanes at –30 °C did not improve purity of the catalyst, which was therefore used without further purification. The product often contained various amounts of uncoordinated *N*,*N*-dimethylbenzylamine, which was difficult to remove in *vacuo*. 1H NMR (400 MHz, C6D6):  8.71 (s, 1H, aryl-H), 8.65 (s, 1H, aryl-H), 7.81 (s, 6H, aryl-H), 7.75 (s, 6H, aryl-H), 7.7 - 6.9 (m, 24H, aryl-H), 6.80 (s, 3H, aryl-H), 6.77 (s, 3H, aryl-H), 6.69 (m, 3H, aryl-H), 3.32 (d, 2*J*H,H = 13.7 Hz, 1H, CH2), 3.24 (d, 2*J*H,H = 13.4 Hz, 1H, CH2), 3.20 (s, 1.5H, CH2 of free amine), 2.74 (d, 2*J*H,H = 13.6 Hz, 1H, CH2), 2.42 (d, 2*J*H,H = 13.9 Hz, 1H, CH2), 2.02 (br. s, 6H, N(CH3)2 of free amine), 1.98 (s, 18H, aryl-CH3), 1.96 (s, 18H, aryl-CH3), 1.80 (s, 3H, N(CH3)2), 1.54 (s, 3H, N(CH3)2), 1.46 (s, 3H, N(CH3)2), 1.35 (s, 3H, N(CH3)2); 13C{1H} NMR (100.6 MHz, C6D6):  180.6 (d, 1*J*Y,C = 52.7 Hz), 163.9, 163.3, 149.0, 141.2, 141.1, 139.6, 138.4, 137.2, 137.1, 136.5, 136.3, 134.9, 134.7, 131.8, 131.2, 130.3, 129.5, 129.3, 129.1, 129.0, 128.9, 128.8, 128.7, 128.4, 127.6, 127.5, 127.2, 126.3, 126.2, 125.8, 125.3, 124.5, 122.3, 117.1, 116.3 (aryl), 67.6 (CH2), 64.4 (CH2 of free amine), 58.1 (CH2 of coordinated amine), 45.6 (N(CH3)2)), 45.3 (N(CH3)2 of free amine), 44.4 (N(CH3)2)), 40.9 (N(CH3)2), 40.0 (N(CH3)2), 21.4 (aryl-CH3).

**Pent-4-enenitrile.**[[8]](#endnote-9) A solution of 1-bromo-4-butene (13.5 g, 0.1 mol) and potassium cyanide (7.2 g, 0.11 mol) in ethylene glycol was heated at 100 °C for 2h. The product was distilled from the mixture at reduce pressure (200 mbar) and dissolved in diethyl ether. The solution was washed with water and dried over Na2SO4. After removal of the solvent the remaining residue was distilled in *vacuo* (80 °C, 130 mbar). Yield 6.43 g (79 %).1H NMR (400 MHz, CDCl3):  5.81 (m, 1H; =CH), 5.11 – 5.18 (m, 2H, =CH2), 2.40 (m, 4H; CH2). 13C1H NMR (100.6 MHz, CDCl3): 134.1 (=CH), 119.1 (CN), 117.6 (=CH2), 29.2 (*C*H2CH=CH2), 16.9 (*C*H2CN).

**1-Phenyl-pent-4-enylamine (10).** To a solution of phenyl magnesium bromide prepared from bromobenzene (1.31 mL, 1.96 g, 12.5 mmol) and magnesium turnings (311mg, 12.8 mmol) in diethyl ether (15 mL) was added pent-4-enenitrile (1mL, 0.814 g, 10.0 mmol) at room temperature and the resulting mixture was refluxed for 4 h. After cooling to room temperature, anhydrous methanol (0.50 mL, 0.40 g, 12.5 mmol) was added (vigorous reaction). The suspension was stirred for 1 h followed by addition of LiAlH4 (0.50 g, 13.2 mmol). More diethyl ether (10 mL) was added and the mixture was refluxed overnight. Water (3 mL) was added carefully (ice bath) and the organic layer was easily separated by decantation from the paste-like residue. The residue was washed with diethyl ether (10 mL). The combined ether solutions were dried over potassium hydroxide, the solvent was removed in *vacuo*. The residue was treated with fine powdered calcium hydride for 2 h and then distilled at reduced pressure. Yield 0.63 g (39 %). 1H NMR[[9]](#endnote-10) (400 MHz, CDCl3):  7.31 (m, 4H, C6H5), 7.23 (m, 1H, C6H5), 5.80 (m, 1H; =CH), 4.93-5.03 (m, 2H; =CH2), 3.89 (t, 3*J*H,H = 6.9 Hz, 1H, PhC*H*NH2), 2.04 (m, 2H, C*H*2CH=CH2), 1.75 (m, 2H, C*H*2CHNH2), 1.45 (br s, 2H, NH2). 13C1H NMR (100.6 MHz, CDCl3): 146.4 (1-C6H5), 138.2 (=CH), 128.4 (C6H5), 126.9 (4-C6H5), 126.3 (C6H5), 114.7 (=CH2), 55.6 (CHNH2), 38.6 (*C*H2CHNH2), 30.7 (*C*H2CH=CH2).

**1-Benzyl-pent-4-enylamine (12).** To a solution of benzyl magnesium chloride prepared from benzyl chloride (2.3 mL, 2.53 g, 20.0 mmol) and magnesium turnings (0.49 g, 20.2 mmol) in diethyl ether (30 mL) was added pent-4-enenitrile (1.5 mL, 1.22 g, 15.0 mmol) at room temperature and the resulting mixture was refluxed for 2 h. After cooling to room temperature, anhydrous methanol (1.2 mL, 0.96 g, 30 mmol) was added (vigorous reaction). The suspension was stirred for 1 h followed by addition of LiAlH4 (1 g, 26.3 mmol). The mixture was refluxed overnight. Water (5 mL) was added carefully and the organic layer was easily separated by decantation from the grey paste-like residue. The residue was washed with diethyl ether (10 mL). The combined ether solution was dried over potassium hydroxide and the solvent was removed in *vacuo*. The residue was treated with fine powdered calcium hydride for 2 h and then distilled at reduced pressure (56-59 °C, 0.05 mbar). Yield 1.30 g (49 %). 1H NMR (400 MHz, CDCl3):  7.29 (m, 2H, aryl-H), 7.20 (m, 3H, aryl-H), 5.82 (m, 1H; =CH), 4.94-5.07 (m, 2H, =CH2), 3.00 (m, 1H, C*H*NH2), 2.81 (dd, 2*J*H,H = 13.3 Hz, 3*J*H,H = 4.7 Hz, 1H, PhC*H*2), 2.46 (dd, 2*J*H,H = 13.4 Hz, 3*J*H,H = 8.6 Hz, 1H, PhC*H*2), 2.18 (m, 2H, C*H*2CH=CH2), 1.58 (m, 1H, C*H*2CHNH2), 1.44 (m, 1H, C*H*2CHNH2), 1.32 (br s, 2H, NH2); 13C1H NMR (100.6 MHz, CDCl3): 139.5 (1-C6H5), 138.4 (=CH), 129.3 (2-C6H5), 128.4 (3-C6H5), 126.2 (4-C6H5), 114.7 (=CH2), 52.2 (CHNH2), 44.6 (PhCH2), 36.6 (*C*H2CHNH2), 30.6 (*C*H2CH=CH2).

**General procedure for NMR-scale catalytic hydroamination/cyclisation reactions.** In the glove box, a screw cap NMR tube was charged with 12 mol of the catalyst, C6D6 (0.5 mL) and the substrate (0.30 mmol) in that order. Conversion was then followed by 1H NMR spectroscopy. In order to ensure accurate integration, a 10s delay between 30° pulses was utilized. Final conversion was determined by 1H NMR spectroscopy (disappearance of olefinic signals). Diastereomeric ratio of pyrollidine **7** was determined by vacuum-transfer of all volatiles and subsequently 1H NMR spectroscopic analysis of characteristic signals (2.73, 2.56, 2.42, 1.62 and 1.39 ppm).

**General procedure for preparative kinetic resolution.** In the glove box, a screw cap NMR tube was charged with the catalyst (20 mol), C6D6 (0.5 mL) and the substrate (1.00 mmol) in that order. The conversion was then monitored by NMR spectroscopy and the reactions were stopped after ca. 50% conversion had been reached. Separation of the product pyrrolidine and the aminoalkene was achieved either by column chromatography or more conveniently by aqueous extraction of the secondary amine acetate from the primary amine benzimine.

**General procedure for column free separation of starting material and product.** To a sample (0.5 mmol of educt, 0.5 mmol of product) was added acetic acid (32 L, 33 mg, 0.55 mmol) followed by addition of benzaldehyde (64 mg, 0.6 mmol). Within a few minutes water separation could be observed. The sample was kept at room temperature for 2 hours and the content of the NMR tube was carefully transferred into a vial. Water (2 mL), benzene (1 mL) and hexanes (1.5 mL) were added. The vial was shaken vigorously and the layers were separated. The organic layer was extracted again with water (2 mL). The combined aqueous layers continaining the pyrrolidine acetate were concentrated to a volume of ca. 0.5 - 1 mL in *vacuo* and sodium hydroxide (0.5 g) was added. The product was extracted with diethyl ether (24 mL) and the etheral solution was dried by passing thought a layer of Na2SO4. The ether was removed in *vacuo* and the residue was dried at 5 mbar to give the 2,5-disubstituted pyrrolidine. The hexanes/benzene layer containing the benzimine was treated with 2 M hydrochloric acid (2 mL) and diethyl ether (3 mL) and the mixture was stirred for 24 h at room temperature. The two layers were separated and the organic layer was extracted again with water (2 mL). The aqueous layers were combined, concentrated in *vacuo* to 1 mL volume and sodium hydroxide (0.5 g) was added. The aminoalkene starting material was extracted into diethyl ether (2  4 mL) and the etheral solution was dried by passing through a layer of Na2SO4. The ether was removed in *vacuo* and the substituted aminopentenes were dried at 5 mbar.

The volatile aminoalkene **8** and pyrrolidine **9** were isolated as hydrochlorides by addition of hydrochloric acid (0.5 ml, 6M) to the diethyl ether solutions with subsequent removal of all volatiles in *vacuo*. Traces of hydrochloric acid and water were removed by evaporation with abs. ethanol. The starting material can contain various amounts of N,N-dimethylbenzylamine.

***Trans*-2-methyl-5-phenylpyrrolidine (11).** 1H NMR (400 MHz, CDCl3):  7.35 – 7.28 (m, 4H, C6H5), 7.20 (m, 3H, C6H5), 4.34 (t, 3*J*H,H = 7.5 Hz, 1H, PhC*H*), 3.50 (m, 1H; C*H*CH3), 2.27 (m, 1H; CH2), 2.08 (m, 1H, CH2), 1.74 (m, 2H, CH2+ NH), 1.42 (m, 1H, CH2), 1.20 (d, 3*J*H,H = 6.3 Hz, 3H, CH3); 13C1H NMR (100.6 MHz, CDCl3): 145.9 (1-C6H5), 128.3 (C6H5), 126.5 (4-C6H5), 126.2 (C6H5), 61.5 (CHPh), 54.0 (*C*HCH3), 35.5 (*C*H2CHCH3), 34.8 (*C*H2CHPh), 22.2 (CH3).

***Trans*-2-benzyl-5-methylpyrrolidine (13).** 1H NMR (300 MHz, CDCl3):  7.27 (m, 2H; C6H5), 7.19 (m, 3H, C6H5), 3.46 (m, 1H, NCH), 3.33 (m, 1H, NCH), 2.79 – 2.61 (m, 2H, PhC*H*2), 2.02 – 1.85 (m, 2H, CH2), 1.53 (br s, 1H, NH), 1.43 (m, 1H, CH2), 1.28 (m, 1H, CH2). 1.19 (d, 2*J*H,H = 6.4 Hz, CH3); 13C1H NMR (75.5 MHz, CDCl3): 140.1 (1-C6H5), 129.0 (2-C6H5), 128.3 (3-C6H5), 126.0 (4-C6H5), 59.2 (*C*HCH2Ph), 52.8 (*C*HCH3), 43.1 (CH2Ph), 33.9 (CH2), 32.1 (CH2), 22.3 (CH3).

**Table S1** Isolated yields of aminoalkenes and pyrrolidines from kinetic resolution.

| Entry | Substrate | Cat. | yield of starting material / % | yield of pyrrolidine / % |
| --- | --- | --- | --- | --- |
| 1 | **8** | **1a** | 39*a* | 49*a* |
| 2 | **8** | **1b** | 43*a* | 35*a* |
| 3 | **10** | **1a** | 47 | 41 |
| 4 | **10** | **1b** | 37*b* | 33*b* |
| 5 | **12** | **1a** | 45 | 39 |
| 6 | **12** | **1b** | 36*b* | 49*b* |
| a isolated as hydrochlorides. *b* isolated by column chromatography. | | | | |

**Separation by column chromatography**

**Separation of 1-phenyl-pent-4-enylamine (10) and t*rans*-2-methyl-5-phenylpyrrolidine (11).** 160 mg of a crude mixture were chromatographed on 60 mL of silica. **10** was eluted using EtOAc:MeOH 5:1. The eluent was then changed to EtOAc:MeOH:Et2NH 5:1:0.1 in order to elute **11**.

**Separation of 1-benzyl-pent-4-enylamine (12) and *trans*-2-benzyl-5-methylpyrrolidine (13).** 175 mg of a crude mixture were chromatographed on 30 mL of silica. **12** was eluted using EtOAc:MeOH 5:1. The eluent was then changed to EtOAc:MeOH:Et2NH 5:1:0.1 in order to elute **13**.

**General procedure for preparation of Mosher amides.** The amine (0.1 mmol) or amine hydrochloride was dissolved in CDCl3 (0.5 mL) in an NMR tube. Hünig’s base (19 mg, 0.15 mmol, respectively 39 mg, 0.30 mmol in case of hydrochlorides) and (R)-(+)-α-methoxy-α-trifluoro-methylphenylacetic acid chloride (33 mg, 0.13 mmol) were added. Enantiomeric excess was then determined by 19F NMR at 60 - 70°C. Mosher amides of hindered pyrrolidines **11** and **13** gave complicated 19F NMR spectra even at high temperature due to severly hindered rotation. For 19F NMR data of Mosher amides of pyrrolidines **3**, **5** and **7** see ref. Error: Reference source not found.

**2-Aminohex-5-ene (8).** 19F NMR (CDCl3, 60 °C):  -69.35, -69.44.

***Trans*-2,5-dimethylpyrrolidine (9).** 19F NMR (CDCl3, 60 °C): -69.5 (br.), -69.9.

**1-Phenyl-pent-4-enylamine (10).**: 19F NMR (CDCl3, 60 °C):  -69.3, -69.4.

**1-Benzyl-pent-4-enylamine (12).** 19F NMR (CDCl3, 60 °C): -69.2, -69.4.

**Table S2** HPLC separation conditions for Chiralcel OD column.*a*

| Substrate | Eluent  Hexanes/*i*PrOH/Et2NH | retention time / min |
| --- | --- | --- |
| **10** | 95:5:0.05 | 7.8; 12.1 |
| **11***b* | 98:2:0.06 | 7.3; 9.1 |
| **13** | 98:2:0.02 | 9.2; 10.2 |
| *a* flow rate 1 mL/min *b* integration was not reliable because different results were obtained at different UV detection frequencies. | | |

**References**

1. P. M. Smith and E. J. Thomas, *J. Chem. Soc. Perkin Trans. 1*, 1998, 3541. [↑](#endnote-ref-2)
2. M. Booij, N. H. Kiers, H. J. Heeres and J. H. Teuben, *J. Organomet. Chem.*, 1989, **364**, 79. [↑](#endnote-ref-3)
3. (*a*) K. Maruoka, T. Itoh, Y. Araki, T. Shirasaka and H. Yamamoto, *Bull. Chem. Soc. Jpn.*, 1988, **61**, 2975. (*b*) L.-Z. Gong and L. Pu, *Tedrahedron Lett.*, 2000, **41**, 2327. [↑](#endnote-ref-4)
4. Y. Tamaru, M. Hojo, H. Higashimura and Z.-I. Yoshida, *J. Am. Chem. Soc.*, 1988, **110**, 3994. [↑](#endnote-ref-5)
5. M. R. Gagné, C. L. Stern and T. J. Marks, *J. Am. Chem. Soc.*, 1992, **114**, 275. [↑](#endnote-ref-6)
6. D. V. Gribkov, K. C. Hultzsch and F. Hampel, *Chem. Eur. J.*, 2003, **9**, 4796. [↑](#endnote-ref-7)
7. (*a*) H. O. House and L. F. Lee, *J. Org. Chem.*, 1976, **41**, 863. (*b*) K. Harding and S. R. Burks, *J. Org. Chem.*, 1981, **46**, 3920. [↑](#endnote-ref-8)
8. A. Toshimitsu, K. Terao and S. Uemura, *J. Org. Chem.*, 1986, **51**, 1724. [↑](#endnote-ref-9)
9. C. Hippeli and Hans-Ulrich Reissig, *Synthesis*, 1987, 77-79. [↑](#endnote-ref-10)
